# Supplementary material for: The core clock gene Per1 phases molecular and electrical circadian rhythms in SCN neurons
Source: PeerJ. 2016 Aug 9;4:e2297. doi: 10.7717/peerj.2297 (PMC4991845; doi:10.7717/peerj.2297)
Supplement: Data S1 — Fluorescence intensities and firing rates for Per1::GFP, Per1–/–, Per2–/–, and Per1–/–; Per2–/– mice in LD and DD. [file peerj-04-2297-s001.xlsx]

## Sheet: LD WT (Per1GFP)
Clock Time	Firing Rate (Hz)	Fluorescence (AFU)
700	4.81522	1.02181
705	4.03313	1.0156
714	1.82943	1.02041
714	0.54	1.00257
718	5.34646	1.04423
721	1.6993	1.01029
722	1.27273	1.01756
726	1.19565	1.00428
727	4.71293	1.01074
730	0.201835	1.0022
735	3.52843	1.00786
740	0.133929	1.00234
744	4.67521	1.04371
748	2.68908	1.0223
754	0.141593	1.00119
759	0.298851	1.00388
813	2.35606	1.00866
817	0.235294	1.00283
820	0.458716	1.00307
822	0.333333	1.02326
825	0.0952381	1
826	3.97786	1.00797
830	0.454545	1.00385
831	1.07837	1.00189
834	0.26087	1.00109
835	4.44286	1.03602
837	0.828947	1.01678
842	7.65667	1.00356
848	0.423423	1.0037
851	2.25246	1.00138
855	5.17391	1.0269
857	6.28814	1.07336
908	3.28763	1.02686
910	5.69492	1.07083
914	3.41667	1.02829
918	2.56522	1.01698
919	2.75585	1.01046
923	5.31967	1.04277
926	7.33051	1.0627
926	7.29915	1.06254
926	2.53125	1.00914
932	2.36667	1.01141
934	1.58725	1.01633
936	5.96667	1.0337
939	7.07627	1.0605
943	6.09016	1.04011
947	5.425	1.0524
951	2.55357	1.01599
1003	2.99331	1.03774
1019	2.2614	1.02889
1026	9.22	1.0906
1036	2.52	1.04711
1056	7.5125	1.05464
1059	5.64602	1.05072
1100	5.62	1.10357
1107	2.376	1.0638
1148	6.63	1.13328
1158	6.67974	1.10296
1206	7.19328	1.07107
1215	11.1137	1.19536
1222	6.71104	1.15453
1226	5.17949	1.06403
1232	5.39597	1.15475
1239	4.90333	1.05713
1240	5.94937	1.13409
1247	6.06689	1.16115
1248	0.857895	1.00578
1255	5.31081	1.13338
1301	0.236572	1.01466
1316	8.65839	1.17858
1321	6.12245	1.09913
1332	7.11448	1.19506
1332	4.84507	1.12064
1336	11.1	1.1514
1336	1.646	1.04884
1339	11.95	1.25088
1341	12.5603	1.18098
1347	5.69565	1.19494
1348	7.3738	1.11416
1353	0.0326887	1.00917
1355	5.02797	1.07066
1358	5.11111	1.12477
1403	6.78761	1.05951
1413	4.66019	1.10356
1418	6.01709	1.10935
1421	7.17857	1.09953
1424	3.42994	1.09563
1426	5.49038	1.08617
1432	5.38462	1.05994
1433	4.26462	1.11653
1438	4.87387	1.07889
1439	7.22034	1.12715
1447	3.22881	1.02985
1453	8.76596	1.11372
1457	1.81452	1.02264
1500	3.52066	1.04789
1502	10.6695	1.14849
1505	4.20339	1.0723
1505	4.77778	1.05578
1510	3.11268	1.0396
1515	2.3	1.02093
1518	2.08943	1.02495
1519	3.51261	1.04314
1523	5.98507	1.07213
1525	4.08333	1.05428
1527	0.275	1.00695
1532	5.25424	1.08765
1535	2.11111	1.03084
1541	4.99153	1.04576
1544	1.69748	1.02416
1545	4.43478	1.11256
1547	6.5228	1.2285
1549	3.10169	1.031
1552	3.14	1.13805
1552	2.82114	1.0298
1555	3.28743	1.065
1556	2.52941	1.01959
1559	3.24167	1.02273
1604	2.23746	1.07391
1604	5.39474	1.05774
1609	0.710526	1.00328
1614	1.23464	1.0843
1617	2.2	1.07413
1620	5.58863	1.06057
1623	3.43697	1.03229
1629	3.89157	1.03033
1707	3.93311	1.15742
1725	1.58824	1.10122
1742	0.404762	1.01608
1745	3.01695	1.05006
1749	4.33058	1.03698
1749	1.68627	1.03939
1752	1.92523	1.03721
1755	3.51852	1.03019
1755	4.06667	1.06688
1802	1.19427	1.07065
1806	1.73418	1.02981
1811	2.52101	1.04529
1815	1.36842	1.02013
1820	3.36937	1.05121
1822	1.23529	1.01427
1824	4.45614	1.05378
1828	3.23232	1.06121
1829	1.89744	1.03082
1832	2.57143	1.03886
1834	6.1913	1.06792
1835	2.89565	1.04
1839	4.02419	1.03625
1841	0.141379	1.07116
1842	2.06838	1.03709
1843	0.464912	1.00387
1845	2.92857	1.0247
1846	0.257732	1.02844
1851	5.08547	1.13492
1900	3.70707	1.05137
1905	3.55932	1.0464
1912	3.58621	1.03524
1913	1.52508	1.11334
1933	0.424658	1.06034
2001	0.12766	1.10342
2015	2.20253	1.04453
2021	2.09639	1.04091
2022	0.459732	1.0264
2025	4.40268	1.05201
2031	7.89189	1.12079
2034	0.883333	1.01124
2036	0.700337	1.1118
2038	1	1.01554
2043	1.45763	1.01985
2047	1.47445	1.038
2054	1.67769	1.06984
2054	4.24691	1.06283
2059	0.776596	1.01959
2104	3.5719	1.12586
2105	1.90517	1.03431
2108	3.20492	1.06019
2114	0.259259	1.01947
2114	0.425197	1.02843
2118	1.96667	1.04007
2121	0.0625	1.0245
2125	2.81301	1.04674
2128	2.35294	1.04556
2132	0.235294	1.01043
2137	1.74286	1.02681
2141	0.578125	1.01305
2152	0.259259	1.04766
2213	0.123188	1.03351
2215	2.62712	1.0467
2228	1.17323	1.01427
2232	0.242321	1.11128
2232	1.4375	1.03535
2232	1.6748	1.03878
2236	2.0708	1.02668
2239	1.9	1.02928
2243	1.66216	1.03043
2246	0.618644	1.00894
2250	0.32967	1.00771
2253	0.056962	1.08283
2301	1.125	1.01735
2304	1.06667	1.02308
2307	0.551724	1.01439
2341	0.885135	1.02307
2354	1.14	1.02626
2356	1.63636	1.02287
17	0.264704	1.02468
17	0.460251	1.0189
41	0.693333	1.01537
47	0.472222	1.01179
51	0.414634	1.00202
55	0.0548523	1.04974
118	0.3135	1.01433
135	0.55968	1.01426
143	0.522474	1.01144
152	0.294118	1.02532
200	0.0909091	1.00729
220	1.3737	1.0212
221	0.724026	1.04549
229	0.115556	1.00922
232	1.24832	1.02573
255	0.692124	1.02164
305	0.790541	1.03334
328	0.0691244	1.01786
338	0.423333	1.00934
355	1.15152	1.01879
412	1.86301	1.02071
413	2.55184	1.01912
417	5.47651	1.02591
430	0.304918	1.02546
438	3.63115	1.01152
439	2	1.00098
444	4.39711	1.01416
452	0.342466	1.01696
455	5.64883	1.02479
501	5.76401	1.02102
509	2.61538	1.0055
521	0.0534351	1.00655
527	2.55853	1.00789
535	1.98473	1.01127
546	2.62207	1.01019
600	2.83278	1.01802
608	2.41333	1.01744
619	6.49667	1.01259
627	2.81395	1.00805
633	3.34286	1.00633
637	3.28094	1.00709
644	1.85586	1.0392
647	1.05747	1.00845
651	0.5	1.00946
656	0.170213	1.00064

## Sheet: LD Per1--
Clock Time	Firing Rate (Hz)	Fluorescence (AFU)
706	7.57	1.00179
709	7.664	1.00122
712	7.58	1.001
835	5.27	1.00916
842	6.32	1.02006
851	8.24	1.00164
855	7.83	1.01032
858	6.39344	1.03266
918	7.84	1.01858
923	5.1	1.0265
927	7.39	1.02692
938	4.7	1.04245
943	8.32	1.01551
946	5.75	1.02042
952	6.87	1.00443
1017	5.68	1.02505
1022	6.7	1.01515
1027	4.37	1.00992
1031	5.63	1.00868
1040	5.31	1.03238
1047	6.38	1.03792
1052	8.29	1.0276
1117	5.64	1.00526
1121	2.59	1.03493
1127	2.58	1.01275
1131	6.68	1.02125
1135	4.75	1.03347
1142	9.19	1.00424
1146	6.77	1.00175
1232	3.91892	1.08743
1240	4.14433	1.06323
1244	5.05	1.00699
1246	7.41071	1.07385
1248	5.88	1.01665
1251	6.74	1.00122
1252	5.15358	1.11357
1255	7.0339	1.02387
1300	4.48123	1.07507
1307	4.59341	1.06803
1314	4.14966	1.08717
1315	2.11667	1.06142
1317	1.00529	1.03615
1318	7.92	1.00239
1322	8.27	1.02852
1323	5.91973	1.05632
1326	5.94	1.04604
1326	9.32	1.00426
1331	4.07119	1.03509
1331	6.0884	1.05246
1332	5.96	1.00645
1333	2.22981	1.0014
1338	7.64024	1.02907
1338	5.35754	1.03693
1342	7.45946	1.03845
1343	4.52542	1.00248
1345	7.72067	1.00511
1348	4.96	1.04361
1348	0	1.00906
1349	6.12	1.04318
1352	0.888889	1.02974
1410	4.79	1.01128
1418	5.65	1.03568
1423	5.3	1.02985
1432	5.19	1.01156
1440	4.89	1.02284
1534	0.86087	1.03457
1538	6.04	1.05746
1542	6.73	1.10519
1546	4.04	1.05995
1549	5.77	1.00709
1553	2.77586	1.07529
1558	6.69	1.08536
1602	5.92308	1.08676
1606	7.7	1.02975
1607	5.32	1.01455
1611	3.95	1.05369
1616	3.51282	1.01818
1617	6.03	1.01613
1620	0	1.04499
1625	5.77	1.02417
1629	4.68421	1.03715
1633	2.23529	1.06514
1638	6	1.06959
1642	4.68	1.11044
1715	5.8547	1.03183
1720	6.11667	1.10714
1725	1.74576	1.02565
1729	6.41406	1.0794
1735	4.40164	1.02216
1739	6.42188	1.15128
1743	5.33898	1.04065
1747	0.333333	1.07362
1752	0	1.08501
1813	3	1.06067
1817	3.952	1.04769
1821	4.16279	1.08765
1825	3.704	1.09062
1830	6.13008	1.02818
1834	5.75	1.1498
1838	0.435897	1.04384
1844	5.51	1.05311
1906	0.925926	1.01044
1910	2.06742	1.06467
1914	4.20606	1.07002
1918	0.396552	1.08393
1919	0.112	1.01559
1924	0.29661	1.06793
1924	2.63025	1.09018
1932	0.898305	1.11912
1936	4.81513	1.05528
1942	6.07937	1.09269
2011	6.92437	1.0205
2015	0	1.06791
2016	9.024	1.08765
2019	5.73109	1.06254
2019	0.445652	1.11475
2021	0.195876	1.03337
2022	0.132353	1.10102
2023	7.27731	1.15976
2026	0.828571	1.07995
2027	4.84874	1.08228
2032	0.888889	1.13606
2038	0	1.07923
2042	0.324324	1.03969
2046	0.822222	1.02305
2118	0.347826	1.13839
2122	3.17391	1.00973
2126	1.47273	1.02595
2130	0	1.03888
2135	0.891667	1.16924
2142	1.73171	1.06636
2147	4.76515	1.00714
2151	2.01653	1.04254
2202	0.966102	1.04143
2206	1.04167	1.08084
2212	1.19835	1.1064
2217	1.16102	1.07761
2221	4.86441	1.04298
2245	6.20588	1.02346
2250	3.66	1.00454
2254	0	1.13557
2302	0	1.00698
2308	0.360902	1.01108
2312	0.782609	1.03984
2320	5.12295	1.02224
2324	0.0869565	1.02919
2328	0.197183	1.05836
2331	0.716667	1.02853
2335	0	1.00409
2340	5.31667	1.00154
2346	4.70248	1.02341
2351	3.45378	1.04762
2353	0.179641	1.01093
2	5.94186	1.01207
9	2.48352	1.00688
9	0.966667	1.00398
15	1.85714	1.00749
17	3.81429	1.0102
21	0.0368098	1.02983
22	0.05625	1.02396
25	0.0508475	1.01103
27	0.132353	1.02948
27	1.64883	1.02068
29	2.89352	1.01121
32	0.0705882	1.0267
34	6.89899	1.00736
38	0.0949721	1.02555
41	0.108772	1.01435
44	2.32222	1.01562
46	0.0714286	1.00674
48	3.90365	1.02205
52	0.10303	1.02754
52	0.103659	1.00629
53	0.0618557	1.01673
58	0.111111	1.00722
103	0.04329	1.00185
103	2.12371	1.01455
104	2.61538	1.00416
110	3.9071	1.00819
111	1.24294	1.0007
114	0.227848	1.01057
120	0.610526	1.01241
125	0.0677966	1.0076
127	0.107143	1.0008
128	0.0754717	1.01179
128	1.38655	1.03093
131	0.188235	1.02532
133	0.0625	1.04519
137	1.80645	1.00174
138	0.0461538	1.01402
139	1.32857	1.0039
142	2.225	1.03273
149	0.6	1.06126
214	0.137255	1.01777
218	0.0604651	1.00657
232	0.0487805	1
237	0.0608696	1.04745
242	0.214286	1.02933
246	0.0545455	1.05101
318	0.121951	1.02905
322	0.12963	1.03096
336	0	1
343	1.69118	1.01419
347	0	1.03857
354	0.551724	1.00103
358	0.555556	1.04708
406	3.52212	1.02321
413	0	1.02563
438	1.99099	1.00102
444	0	1.00735
449	0.983333	1.0036
455	0.101852	1.0707
511	6.39474	1.01299
514	4.94355	1.04237
518	7.38017	1.03949
522	0.65	1.00837
528	4.575	1.02087
532	6.08661	1.00184
546	7.10909	1.00196
549	8.53	1.02422
601	6.79646	1.02218
616	7.67	1.00117
621	4.68	1.00254
625	2.21739	1.00762
631	7.25	1.00128
634	7.38	1.01527
641	9.05	1.01089
	9.32

## Sheet: LD Per2--
Clock Time	Firing Rate (Hz)	Fluorescence (AFU)
725	1.28846	1.00728
729	0.103448	1.00483
733	0.103448	1.01724
737	0.115385	1.00676
741	0.123077	1.02013
744	2.71094	1.01494
748	0.409091	1.00153
752	0.125	1.01179
755	0.62069	1.05357
814	2.504	1.02939
818	0.132075	1.01661
821	4.37607	1.02681
825	0.289474	1.03584
828	4.66364	1.01723
834	0.12766	1.01887
841	0.983333	1.02587
845	3.69672	1.05937
848	5.18803	1.04339
851	0.224	1.01587
908	0.110092	1
914	4.90244	1.0225
922	4.232	1.02322
928	4.38318	1.04225
931	0.589286	1.04339
934	1.432	1.01921
937	3.72	1.02494
941	1.59322	1.00551
944	4.68841	1.02496
947	5.42149	1.01228
1008	5.30328	1.00136
1011	3.38333	1.01423
1015	6.23529	1.04131
1018	3.37391	1.02142
1024	6.525	1.02338
1029	1.45763	1.0038
1033	0.938053	1.03373
1041	4.53782	1.0064
1045	2.64167	1.02644
1049	0.4	1.03787
1115	2.80833	1.03943
1122	1.50893	1.0369
1125	4.7931	1.0254
1130	1.94915	1.02277
1155	3.125	1.00571
1159	3.00781	1.04443
1203	4.58333	1.00581
1207	4.53782	1.03675
1212	5.44	1.04835
1221	4.7381	1.14602
1227	3.8062	1.07143
1235	3.99048	1.12018
1239	3.88462	1.03543
1242	6.39516	1.06841
1246	5.98413	1.05839
1249	7.25806	1.06171
1329	8.875	1.17002
1332	1.2437	1.04796
1335	3.78151	1.06433
1342	6.97521	1.08665
1345	6.8	1.10953
1350	4.10924	1.05905
1355	6.95868	1.1199
1358	8.67391	1.16404
1413	4.30833	1.07374
1417	7.67442	1.11907
1421	5.78862	1.10148
1425	11.5462	1.19945
1428	7.20968	1.1395
1432	1.52941	1.01458
1436	5.30508	1.10163
1440	6.73282	1.11145
1445	7.26562	1.1099
1450	8.03409	1.09867
1508	3.51042	1.03481
1511	3.7479	1.0933
1515	7.28125	1.15086
1519	3.22656	1.08362
1522	4.064	1.06312
1527	2.69492	1.0255
1531	3.40336	1.06066
1536	4.05738	1.07958
1539	3.98305	1.05698
1543	5.82707	1.05193
1546	6.45802	1.04986
1604	0.608333	1.01385
1608	3.28	1.06085
1613	2.95312	1.0577
1617	2.87395	1.02235
1622	1.61446	1.01319
1625	3.43333	1.0475
1632	4.15079	1.05176
1636	0.716667	1.01788
1640	1.975	1.01814
1644	1.33333	1.02114
1703	5.30508	1.06438
1709	1.04959	1.03738
1712	3.01316	1.03013
1718	4.82677	1.06803
1723	1.20134	1.03625
1727	1.4321	1.03945
1734	1.31783	1.01583
1739	1.66667	1.00786
1742	3.35833	1.04598
1746	1.2087	1.0318
1801	1.8374	1.01734
1806	4.27119	1.05567
1811	1.49587	1.01452
1815	2.632	1.05577
1820	2.62205	1.03795
1823	0.948276	1.0128
1828	0.90991	1.02679
1832	0.689655	1.03058
1835	0.962963	1.01195
1840	1.53175	1.01061
1945	1.4537	1.02147
1950	0.625	1.02583
1955	1.78182	1.04632
1957	3.90196	1.05075
1959	0.711864	1.02857
2005	0.16	1.01503
2011	0.358696	1.00791
2020	0.190909	1.00986
2023	0.157895	1.02013
2027	0.12987	1.0009
2032	0.269231	1.02772
2040	0.151261	1.04177
2047	0.258621	1.04988
2052	0.08	1.01698
2055	0.407407	1.03486
2114	1.15556	1.05862
2118	0.0465116	1.03668
2127	1.27869	1.05368
2133	1.16667	1.01699
2138	0.814815	1.03394
2145	0.46281	1.03817
2150	0.407407	1.03073
2153	0.121739	1.01666
2156	0.157143	1.04373
2159	0.158537	1.01111
2217	0.786667	1.07411
2220	1.31034	1.05874
2223	0.526316	1.04674
2227	0.228916	1.0475
2230	0.0555556	1.00152
2236	0.240741	1.02013
2238	1.375	1.10717
2241	0.625	1.09456
2244	0.552239	1.00371
2248	1.45455	1.04804
2315	0.191304	1.01708
2318	0.548387	1.00697
2322	0.623932	1.02224
2325	0.92562	1.03297
2328	0.306667	1.03507
2332	0.75	1.01822
2335	0.333333	1.02032
2339	1.14286	1.01028
2342	0.564356	1.01729
2345	1.02128	1.03551
2414	0.923729	1.03862
2421	0.12766	1.02597
2428	0.611111	1.01026
2428	0.704545	1.03043
2431	0.365385	1.03665
2432	0.573913	1.02884
2434	0.433333	1.02188
2435	0.543478	1.02301
2437	0.274725	1.01061
2441	1.27027	1.01315
2445	0.261682	1.00309
2448	1.54545	1.00093
2451	0.0888889	1.01453
2455	0.566038	1.00485
2458	0.905172	1.00629
2519	0.621622	1.00248
2522	0.893443	1.01475
2526	0.175439	1.02737
2529	0.2	1.02
2532	0.532468	1.03342
2536	0.578947	1.00135
2540	0.0722892	1.00131
2543	0.261364	1.00799
2546	0.544118	1.03218
2554	0.598361	1.03051
2620	0.75	1.00674
2625	0.130841	1.02664
2628	0.25641	1.01853
2631	0.145631	1.02573
2635	0.370787	1.01273
2638	0.869565	1.0167
2642	0.450704	1.02868
2645	0.643836	1.01543
2648	1.2126	1.00278
2651	0.342857	1.02946
2714	0.366071	1.00911
2719	1.43678	1.01728
2722	1.51111	1.02632
2725	0.114286	1.01985
2728	0.177215	1.0151
2732	0.630573	1.03379
2735	0.197368	1.02369
2739	0.307692	1.01918
2742	0.269231	1.01695
2746	1.60169	1.02337
2810	1	1.02632
2814	0.386364	1.0029
2817	0.247059	1.00735
2820	0.373494	1.02224
2824	0.791209	1.01355
2827	1.75556	1.03164
2835	0.854369	1.01803
2839	0.169231	1.01592
2842	1.48515	1.02835
2847	0.673684	1.02898
2910	0.75	1.04563
2913	1.57018	1.02696
2918	0.485714	1.01216
2921	2.16514	1.028
2925	0.473684	1.00326
2928	1.8595	1.02602
2932	2.44776	1.03009
2935	0.794118	1.01817
2938	1.27273	1.02848
2943	5.14754	1.04414
3001	1.21094	1.02198
3004	5.03361	1.0098
3009	2.42373	1.01627
3013	0.674419	1.02902
3016	2.6129	1.02333
3019	0.426087	1.00466

## Sheet: LD WT GABAzine
Zeitgeber time (ZT)	Firing Rate (Hz)	Fluorescence (AFU)
6	0.174312	1.13701
6	11.1017	1.19305
6	7.25833	1.09109
6	2.32283	1.11166
6	4.48	1.19321
6	3.26136	1.17452
6	10.2121	1.08271
6	6.35294	1.10433
6	0.703704	1.16598
6	6.37273	1.20874
6	0.0952381	1.1073
6	5.56303	1.09808
6	6.21008	1.09538
6	6.21008	1.07228
6	3.28571	1.08079
6	3.36134	1.07882
6	5.91597	1.10861
18	0.311828	1.01053
18	0.28	1.0198
18	0.818182	1.00503
18	0.256637	1.016
18	0.376	1.03422
18	0.12844	1.01178
18	0.312883	1
18	0.22093	1.00756
18	0.5625	1
18	0.241379	1.01368
18	0.107843	1.0274
18	0.169014	1
18	0.628571	1
18	0.424242	1.01075
18	0.135135	1.00401

## Sheet: DD WT
Circadian time (CT)	Firing Rate (Hz)	Fluorescence (AFU)
0	0.146067	0.994952
0	5.10435	1.05339
0	0.238806	0.981209
0	1.40179	1.0279
0	0.0338983	0.992693
0	0.1	0.991402
0	5.75455	1.03689
0	2	1.02134
0	0.191919	0.992709
0	0.698276	1
0	0.26087	1
0	0.0625	1
0	0.625	1
0	2.51111	1
0	2.18033	1
0	0.347458	1
6	6.22222	1.11804
6	7.01613	1.09949
6	4.0531	1.07895
6	1.70677	1.02801
6	6.76871	1.08814
6	7.45312	1.09932
6	15.039	1.07203
6	8.56522	1.06004
6	7.82927	1.04666
6	5.25	1.03318
6	2.29412	1.03319
6	4.56667	1.05751
12	6.81513	1.0547
12	2.16807	1.04449
12	1.95	1.03289
12	0.614679	1.06958
12	3.38983	1.10091
12	2.55652	1.04944
12	3.11864	1.10194
12	2.15966	1.12984
12	3.62393	1
12	1.19811	1.042
12	5.2875	1.05205
12	3.175	1.09413
12	4.8547	1
18	1.16296	1.05
18	3.61074	1.08588
18	6.07812	1.08602
18	0.08	0.980036
18	0.0833333	0.991751
18	0.128205	0.995447
18	1.33333	1.03879
18	0.0595238	1
18	4.87671	1.06957
18	2.76923	1.03577
18	0.0454545	1
18	0.030303	1
18	1	1
18	0.4	1
18	0.2	1
18	3.28571	1
18	0.73913	1

## Sheet: DD Per1--
Circadian time (CT)	Firing Rate (Hz)	Fluorescence (AFU)
0	6.12605	1.03062
0	10.0333	1.07047
0	6.98361	1.05488
0	2.09353	1.08182
0	5.77419	1.04749
0	1.33333	1.11661
0	10	1.06504
0	13.3782	1.01183
0	15.704	1.10516
0	8.33884	1.0581
0	9.72222	1.05968
0	4.30252	1.09704
0	3.56557	1.06865
0	4.70588	1.11396
0	13.3308	1.20941
0	0.57971	1.18754
0	1.19048	1.13453
0	4.58095	1.06389
0	0.741071	1.10766
0	0.247788	1.19702
6	2.48305	1.02809
6	2.96639	1.0022
6	2.60504	1.03053
6	1.32468	1.05109
6	3.57143	1.02997
6	5.35294	1.02017
6	3.73333	1.00778
6	4.61667	1.0295
6	4.33333	1.01511
6	5.22308	1.01157
6	4.63281	1.05928
6	2.60169	1.18725
6	8.04959	1.0364
6	4.99153	1.01224
6	4.36567	1.01325
6	2.66102	1.05743
6	0.905983	1.14114
6	6.2314	1.08542
6	11.6134	1.13503
6	4.07377	1.07334
12	8.55752	1.04603
12	7.87013	1.0354
12	1.10084	1.06748
12	6.21233	1.0079
12	3.63636	1.01634
12	2.48305	1.05232
12	0.236842	1.01916
12	0.149098	1.04293
12	0.554545	1.02554
12	2.71667	1.03182
12	0.175926	1.07614
18	2.15833	1.02486
18	2.13675	1.04727
18	2.78333	1.04587
18	3.28235	1.02596
18	7.23967	1.04276
18	0.585366	1.0745
18	0.301587	1.05325
18	0.210526	1.04159
18	6.88112	1.02515
18	2.71698	1.06417
	15.704

## Sheet: DD Per2--
Circadian time (CT)	Firing Rate (Hz)	Fluorescence (AFU)
0	0.289474	1.02195
0	0.685039	1.0132
0	0.146552	1.00374
0	0.111111	1.01464
0	0.897436	1.00134
0	1.85124	1.03488
0	3.25862	1.03597
0	1.78632	1.01887
0	0.4375	1.01247
0	1.12121	1.01988
0	0.533333	1.01433
0	2.36585	1.03723
6	9.5	1.07459
6	10.7778	1.13969
6	4.91892	1.05324
6	4.43651	1.06889
12	3.2314	1.08131
12	3.51181	1.03187
12	6.63025	1.04046
12	5.11765	1.04799
12	5.45763	1.04194
12	3.04202	1.01921
12	2.06723	1.03302
18	0.37	1.01166
18	0.94	1.00081
18	0.235294	1.01464
18	0.540984	1.01354
18	0.944	1.01917
18	0.142857	1.01013
18	0.313043	1
18	0.116505	1.00629
18	0.25	1.01691

## Sheet: DD Per12--
Circadian time (CT)	Firing Rate (Hz)	Fluorescence (AFU)
7	3.23846	1.06693
7	3.16807	1.10233
7	5.46341	1.08408
7	0.785124	1.05516
7	1.27907	1.09564
7	4	1.06003
8	1.89916	1.02823
8	3.36667	1.00286
8	4.11628	1.02952
8	0.1	1.0027
8	8.64062	1.03668
8	8.19847	1.04201
8	1.05785	1.00158
8	0.168539	1.05112
8	1.51587	1.04655
8	3.46218	1.01121
8	4.60504	1
8	4.04167	1
8	2.53226	1.01995
8	4.63415	1.04808
8	4.91473	1.02778
8	5.85833	1.02911
8	0.31746	1.00228
9	6.69767	1.04701
9	1.99174	1.03773
9	2.01361	1.03875
9	9.17391	1.03881
9	6.75862	1.04918
9	9.18605	1.02059
9	6.17544	1.03492
9	4.60417	1.0904
9	5.75	1.01178
9	4.74797	1.03248
9	4.07438	1.07249
9	3.98291	1.02492
9	1.33077	1.04017
9	3.61345	1.09704
9	3.49367	1.05204
9	2.58678	1.05037
9	8.456	1.04392
9	1.5641	1.02549
9	4.81513	1.05051
9	4.72222	1.00672
10	4.775	1.08048
10	2.65	1.01797
10	4.76271	1.03926
10	5.85366	1.00908
10	2.37302	1.00542
10	4.98319	1.04368
10	6.1215	1.02673
10	12.4661	1.04327
10	10.913	1
10	4.86957	1.00698
10	4.83636	1.01747
10	0.758333	1
10	5.85246	1.022
10	2.84426	1.02302
10	13.9512	1.00743
10	0.396396	1.02685
10	4.54918	1.06464
10	4.72358	1.04216
10	6.78417	1.04571
10	2.64151	1.07309
11	9.96721	1.02423
11	6.4898	1
